# Supplementary material for: Sexually Dimorphic Effects of Histamine Degradation by Enteric Glial Histamine N-Methyltransferase (HNMT) on Visceral Hypersensitivity
Source: MDPI journal article supplement (doi:10.3390/biom13111651), 2023-11-14

**Figure 2 B**

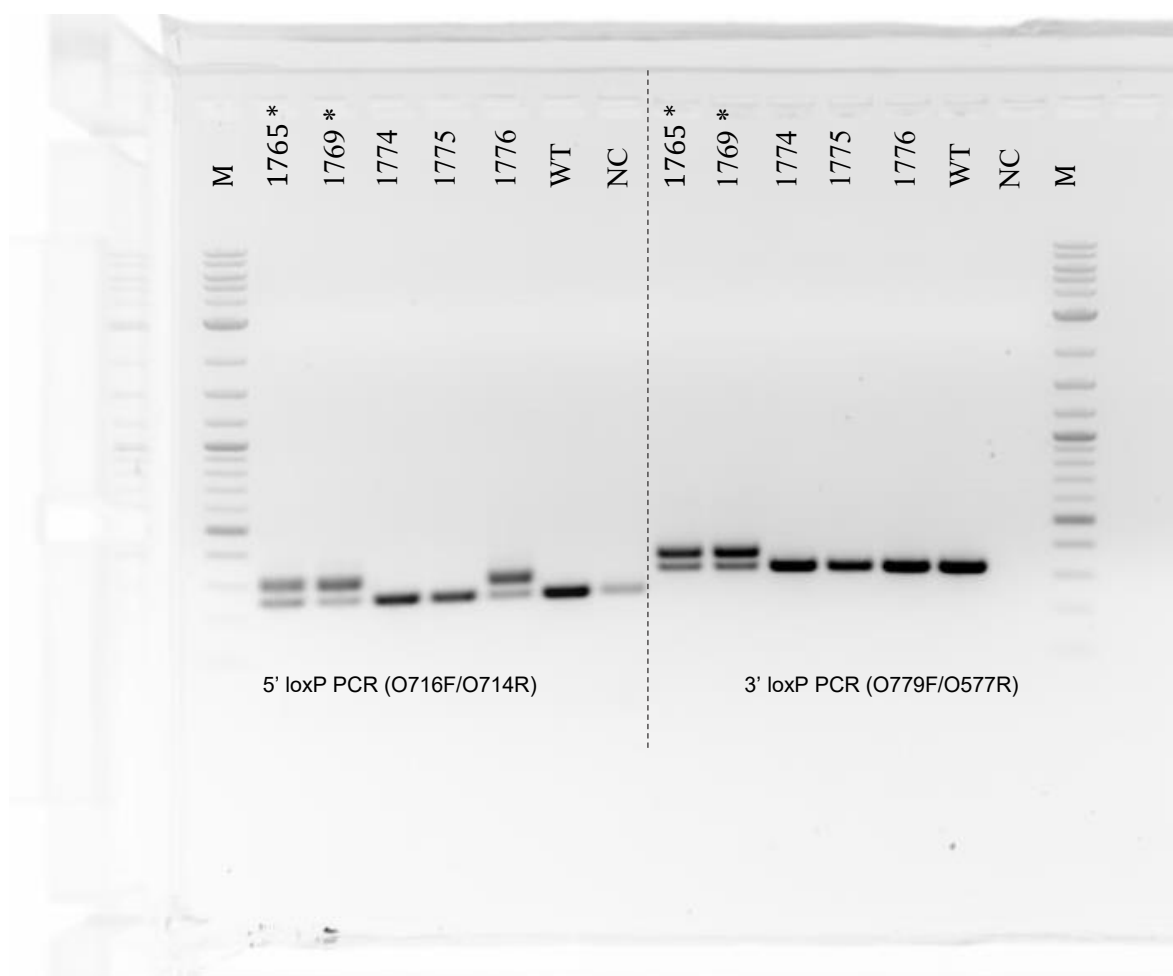

M = Ladder molecular weight; WT = Wild-type; NC = Negative Control

**Figure S1 E**

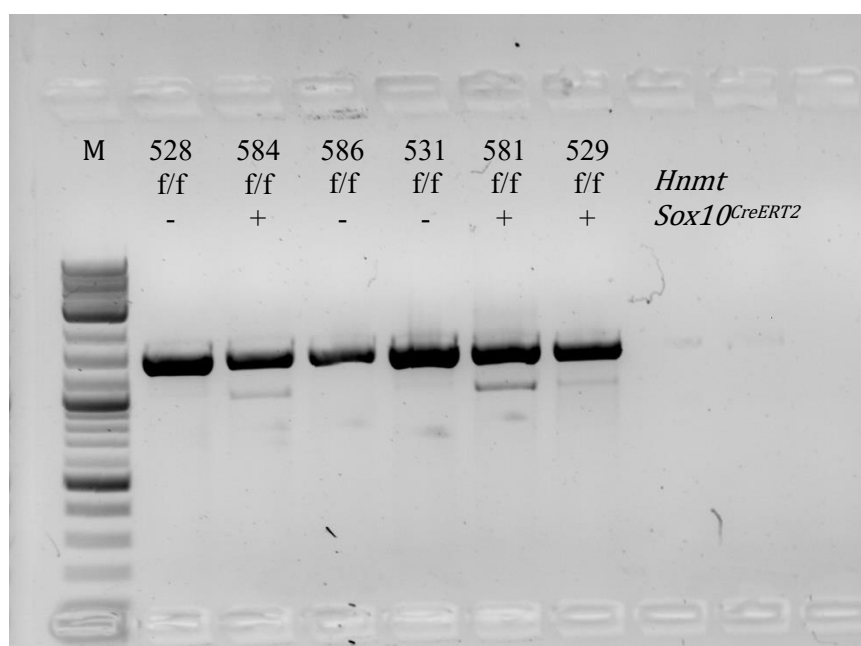

**Figure S2 A**

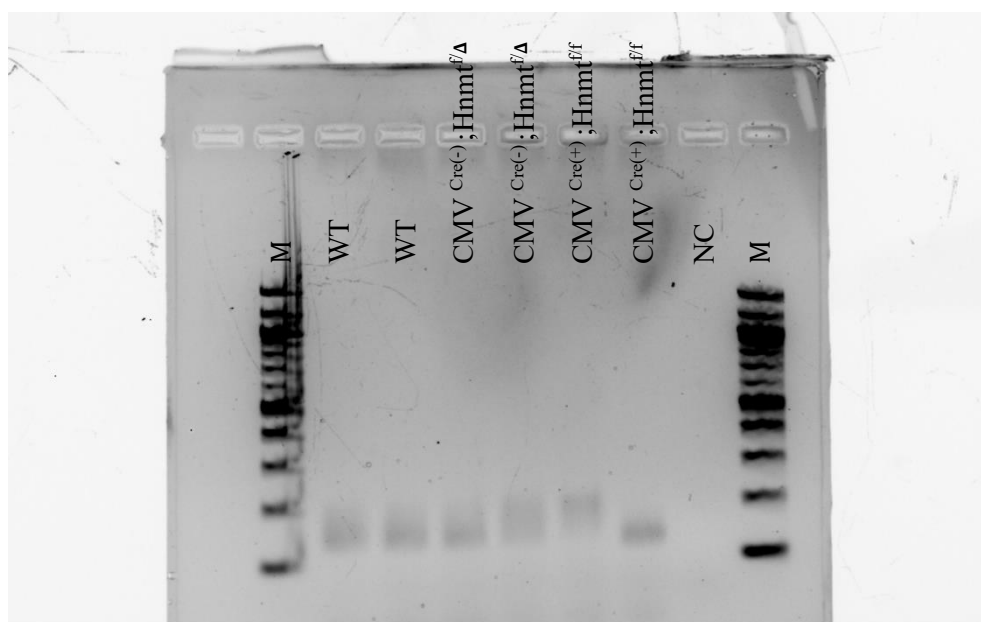

**Figure S2 B**

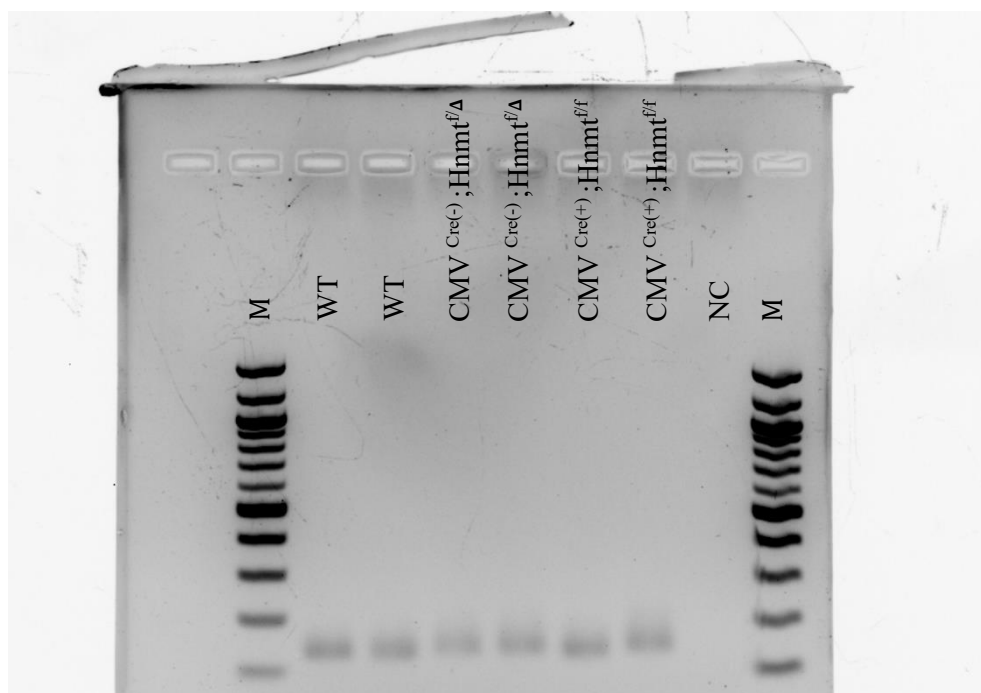

**Figure S2 C**

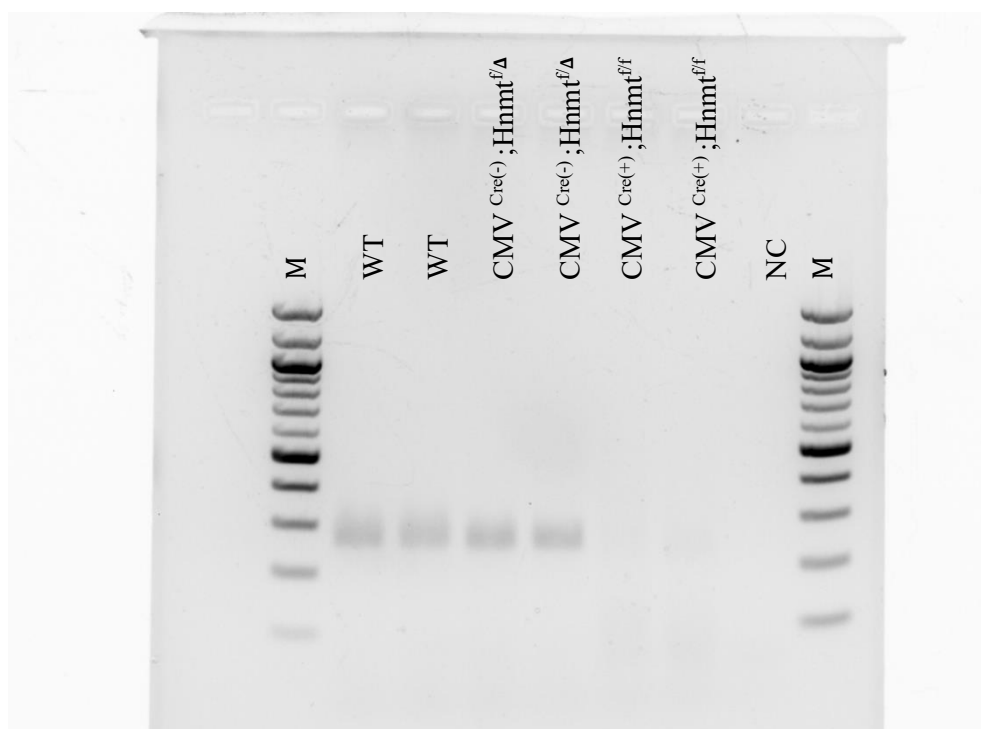

**Figure S2 D**

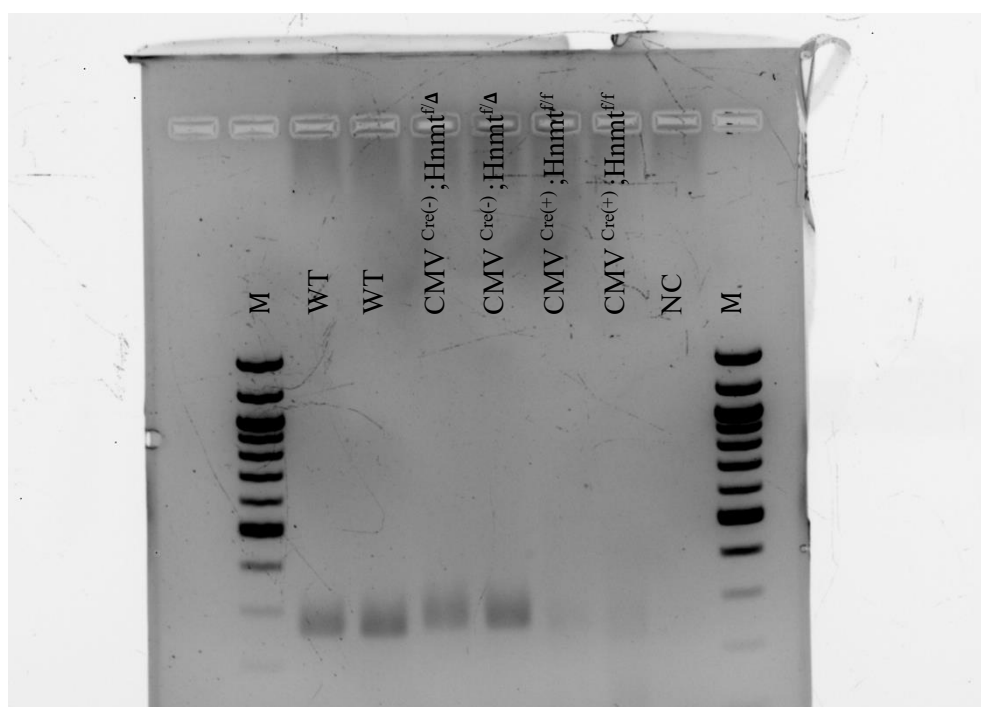

**Figure S2 E**

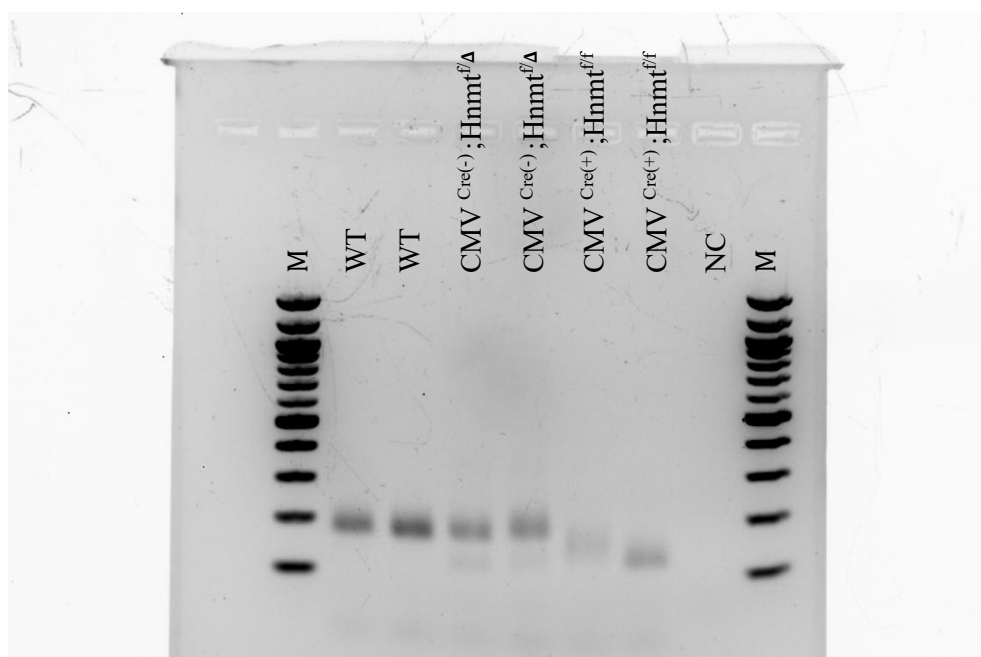

**Figure S2 F**

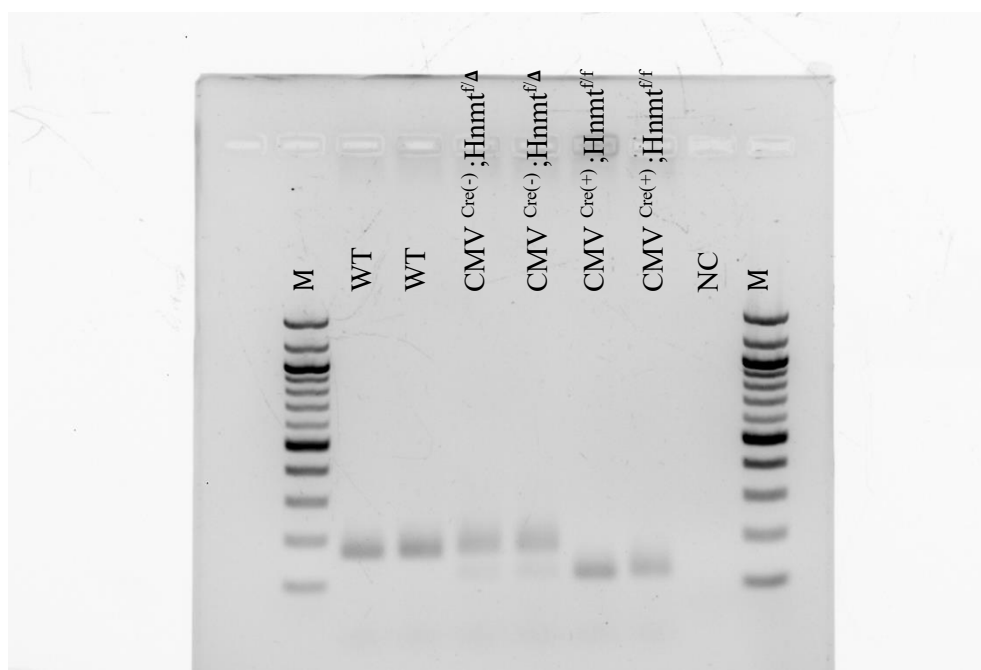

Supplement: s1 [file s1]
